# Supplementary material for: Behaviour and mobility of U and Ra in sediments near an abandoned uranium mine, Cornwall, UK
Source: Royal Society of Chemistry journal article supplement (doi:10.1039/c4em00230j), 2014-12-03
Supplement: c4em00230j1.pdf [file c4em00230j1.pdf]

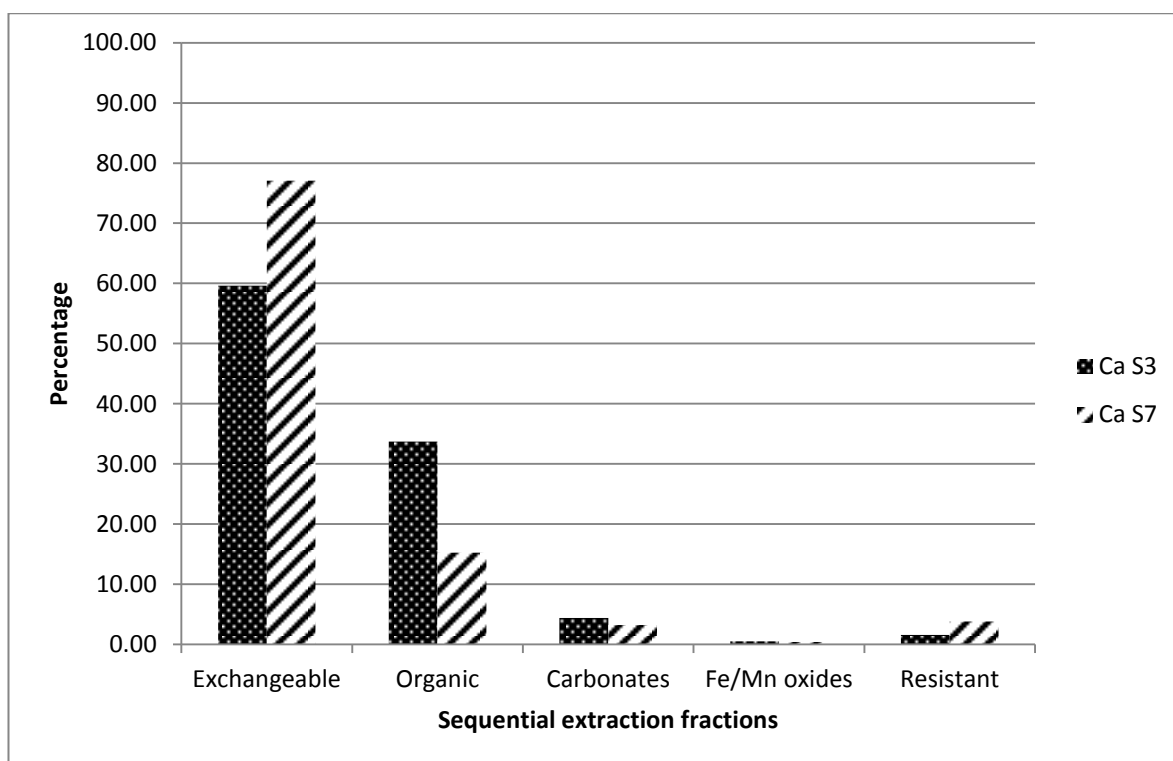

**Figure S1** Extraction profile of calcium as a percentage of the sum of five fractions in S3 and S7

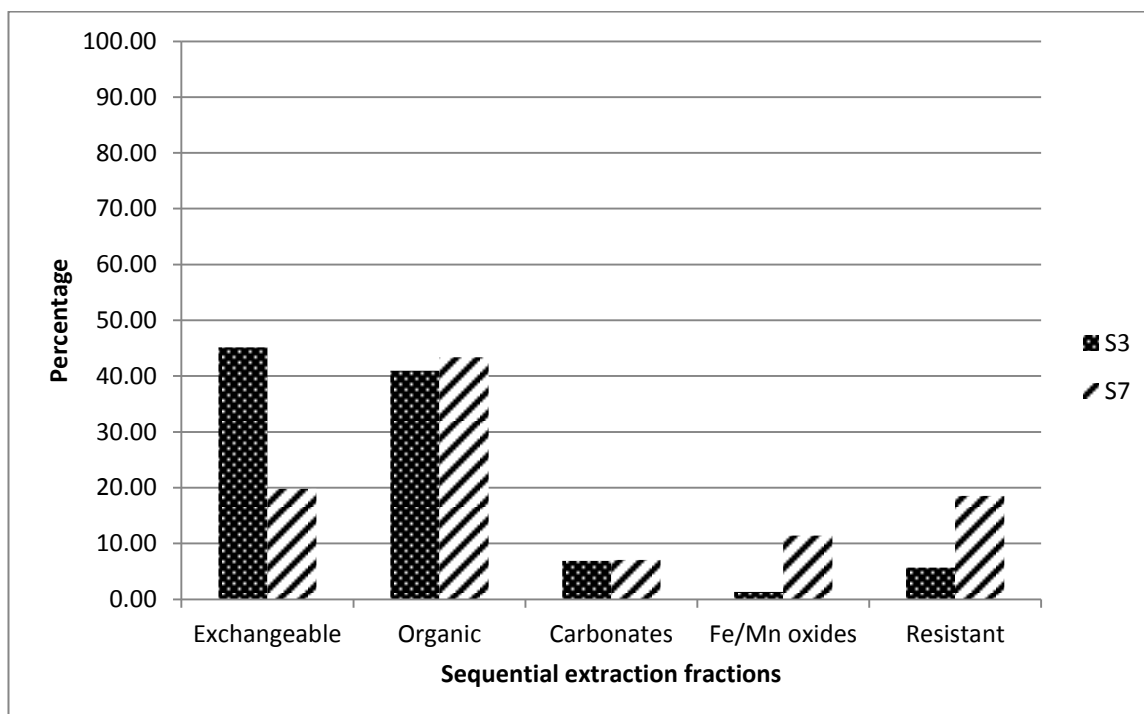

**Figure S2** Extraction profile of manganese as a percentage of the sum of five fractions in S3 and S7

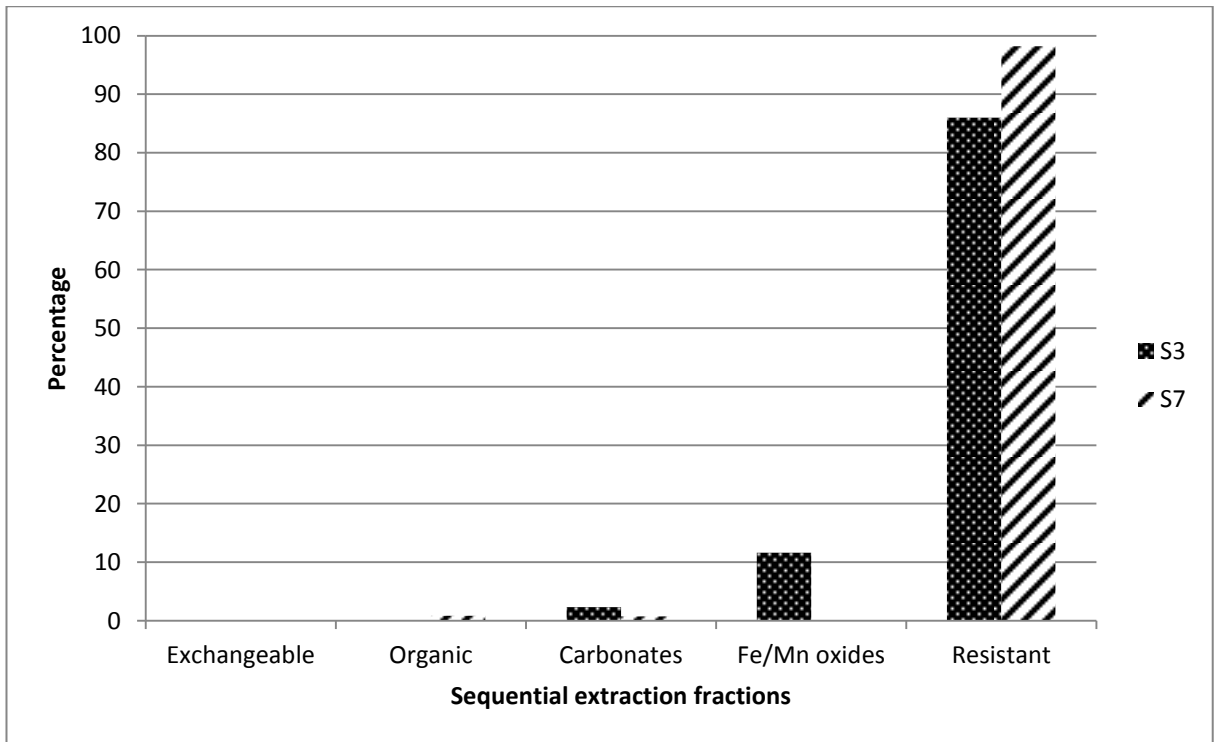

**Figure S3** Extraction profile of titanium as a percentage of the sum of five fractions in S3 and S7

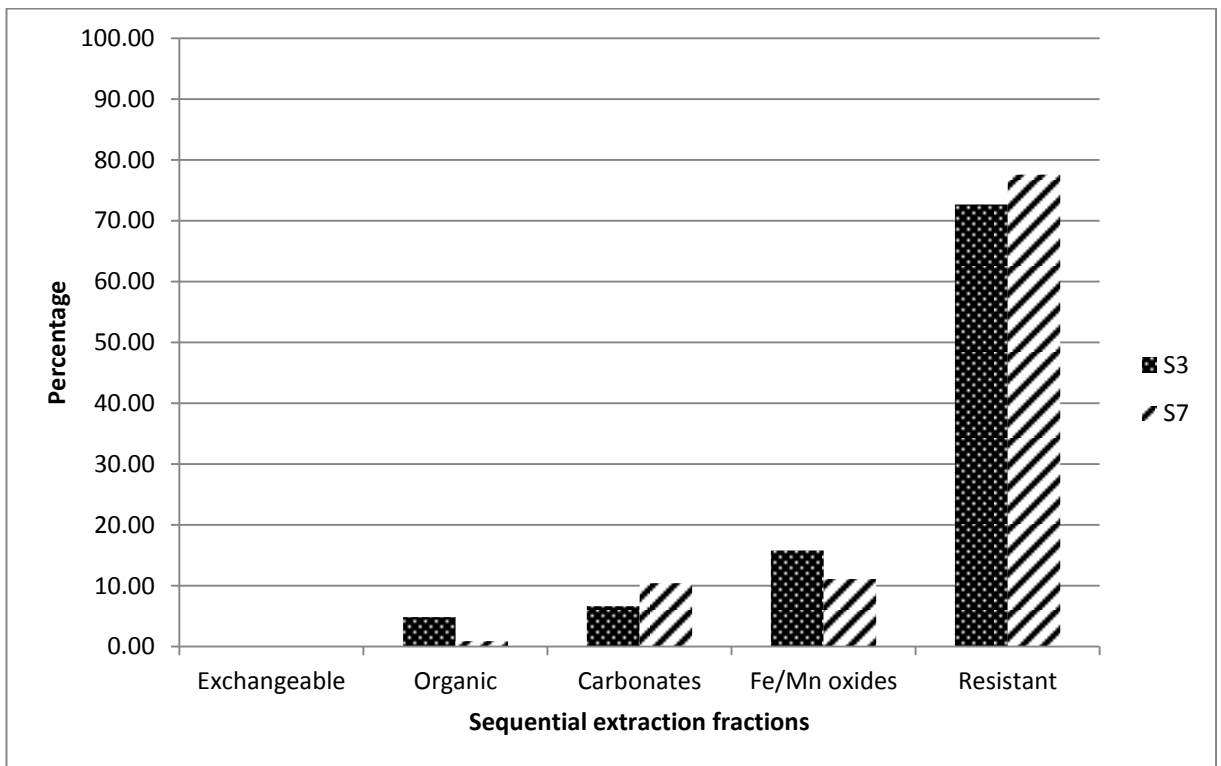

**Figure S4** Extraction profile of iron as a percentage of the sum of five fractions in S3 and S7

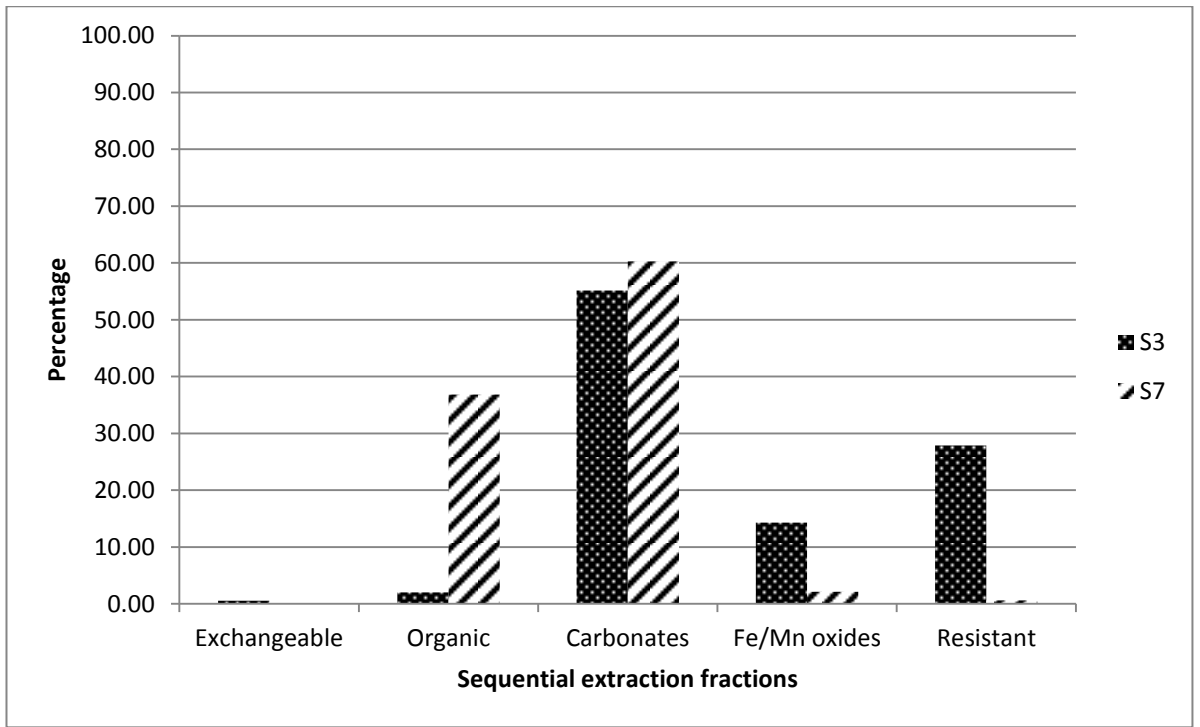

**Figure S5** Extraction profile of arsenic as a percentage of the sum of five fractions in S3 and S7

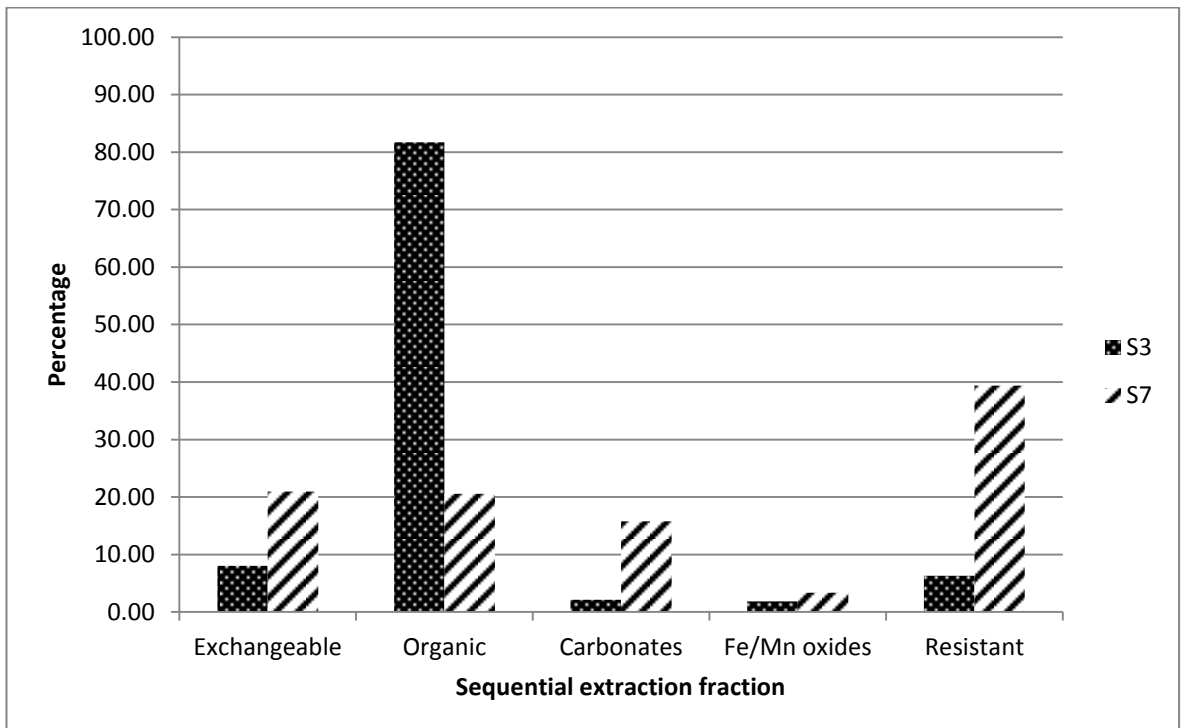

**Figure S6** Extraction profile of barium as a percentage of the sum of five fractions in S3 and S7

**Table S1** Summary of the sequential extraction method applied for radionuclides and stable elements from Cornwall sediments (sample/reagent ratio is 1.0 g/ 15 .0 mL)

| Fraction       | Extractive reagents                  | Temp. °C | Shaking time (h) |
|----------------|--------------------------------------|----------|------------------|
| Exchangeable   | 0.4 M MgCl <sub>2</sub>              | R. T.    | 1                |
| Organic matter | 5-6% NaOCl (pH7.5)                   | 96       | 0.5 x 2          |
| Carbonates     | 1 M NaOAc in 25% HOAc (pH 4)         | R. T.    | 2 x 2            |
| Oxides (Fe/Mn) | 0.04 M NH <sub>2</sub> OH.HCl (pH 2) | R. T.    | 5                |
| Residual       | HCl/HNO <sub>3</sub> (3:1)           | 96       | 2                |

**Table S2** Mineralogical composition from XRD and loss on ignition of sediments collected from the River Fal and side streams in Cornwall

| ID  | L.O.I. | Quartz% | <sup>a</sup> Total phy.% | TiO <sub>2</sub> % | Dolomite% | Chlorite% | Jarosite% |
|-----|--------|---------|--------------------------|--------------------|-----------|-----------|-----------|
| S1  | 5.2    | 88      | 6                        | 5                  | -         | -         | -         |
| S2  | 22.3   | 77      | 18                       | 1                  | -         | 4         | -         |
| S3  | 37.0   | 77      | 11                       | 7                  | -         | 2         | -         |
| S4  | 1.0    | 84      | 12                       | 2                  | -         | 2         | -         |
| S5  | 1.0    | 50      | 11                       | 6                  | 1         | 1         | -         |
| S6  | 5.8    | 76      | 15                       | 8                  | 1         | -         | -         |
| S7  | 21.0   | 66      | 20                       | 9                  | 2         | 3         | -         |
| S8  | 24.8   | 79      | 7                        | 6                  | 1         | 7         | -         |
| S9  | 2.1    | 80      | 10                       | 7                  | 1         | 2         | -         |
| S10 | 0.7    | 79      | 11                       | 6                  | 1         | 2         | -         |
| S11 | 1.0    | 73      | 10                       | 7                  | 1         | 2         | -         |
| S12 | 28.6   | 82      | 7                        | 6                  | 1         | 2         | -         |
| S13 | 20.0   | 80      | 12                       | 6                  | -         | 2         | -         |
| S14 | 1.5    | 80      | 12                       | 6                  | 2         | -         | -         |
| S15 | 0.7    | 78      | 11                       | 9                  | 1         | 1         | -         |
| S16 | 0.8    | 73      | 16                       | 9                  | 2         | -         | -         |
| S17 | 5.8    | 77      | 5                        | 8                  | -         | 3         | 5         |
| S18 | 0.8    | 74      | 15                       | 9                  | 2         | -         | -         |
| S19 | 1.1    | 79      | 10                       | 8                  | 1         | 1         | -         |
| S20 | 1.0    | 87      | 10                       | 5                  | 1         | 2         | -         |

<sup>a</sup>Total phy. Represents Total phyllosilicates (muscovite and kaolinite)
